# Supplementary material for: Unlocking Mo, P co-doping to boost proton intercalation in MnO2 as a high-performance cathode material for aqueous zinc-ion batteries
Source: Royal Society of Chemistry journal article supplement (doi:10.1039/d4tc04556d), 2025-01-01
Supplement: d4tc04556d1.pdf [file d4tc04556d1.pdf]

# **Unlocking Mo, P co-doping to boost proton intercalation in MnO<sub>2</sub> as a high-performance cathode material for aqueous zinc-ion batteries**

Kaixuan Ma<sup>a, d</sup>, Guangfeng Liang<sup>a</sup>, Qingze Jiao<sup>a, b</sup>, Haibo Jin<sup>b, c</sup>, Yuefeng Su<sup>b, c</sup>, Ning Li<sup>b, c</sup>, Jingbo Li<sup>b, c</sup>, Zhiyong Xiong<sup>b</sup>, Caihong Feng<sup>a, b\*</sup>, Yun Zhao<sup>a\*</sup>

a Beijing Key Laboratory for Chemical Power Source and Green Catalysis, School of Chemistry and Chemical Engineering, Beijing Institute of Technology, Beijing 100081, People's Republic of China

b Beijing Institute of Technology (Zhuhai Campus), Zhuhai 519088, China

c School of Materials Science and Engineering Beijing Key Laboratory of Environmental Science and Engineering Beijing Institute of Technology Beijing 100081 P. R. China

d BAIC Foton Automotive Co., Ltd, Beijing 102206, China

\*Corresponding authors. E-mail address

Caihong Feng, E-mail: [fengch@bit.edu.cn](mailto:fengch@bit.edu.cn)

Yun Zhao, E-mail: [Zhaoyun@bit.edu.cn](mailto:Zhaoyun@bit.edu.cn)

## **S1. Experimental**

### **Experimental methods**

#### **Synthesis of Mo doping MnO<sub>2</sub> nanoflowers**

0.056 g of MnSO<sub>4</sub>·4H<sub>2</sub>O and 0.32 g of KMnO<sub>4</sub> were dissolved in 48 mL of deionized water and stirred for 5 minutes. Then 0.0 g (noted as MnO<sub>2</sub>) or 0.024 g (MnSO<sub>4</sub>·4H<sub>2</sub>O to (NH<sub>4</sub>)<sub>6</sub>Mo<sub>7</sub>O<sub>24</sub>·4H<sub>2</sub>O was 1:0.06, noted as Mo-MnO<sub>2</sub>) of (NH<sub>4</sub>)<sub>6</sub>Mo<sub>7</sub>O<sub>24</sub>·4H<sub>2</sub>O was added to the mixed solution and stirred for 5 minutes. Transfer the above solution to a polytetrafluoroethylene autoclave heat to 160 °C and hold for 12 hours. Subsequently, samples were collected by centrifugation and washed several times with deionized water. Finally, Samples were dried under vacuum at 60 °C.

#### **Synthesis of Mo, P co-doping MnO<sub>2</sub> nanoflowers**

For Mo, P co-doped MnO<sub>2</sub> (Mo, P-MnO<sub>2</sub>), NaH<sub>2</sub>PO<sub>2</sub> (the mass ratio of Mo-MnO<sub>2</sub> to NaH<sub>2</sub>PO<sub>2</sub> was 1:0.7) was placed upstream and prepared Mo-MnO<sub>2</sub> was placed downstream and heated up to 300 °C at 2 °C min<sup>-1</sup> and kept for 60 min. P-doped MnO<sub>2</sub> (P-MnO<sub>2</sub>) was prepared as described above, with NaH<sub>2</sub>PO<sub>2</sub> upstream and prepared MnO<sub>2</sub> downstream. All the processes were carried out under argon atmosphere.

### **Material characterization**

The crystallinity of the samples was examined by the powder X-ray diffraction

(XRD, Bruker, Germany) with Cu K $\alpha$  at 40 kV at the 2 $\theta$  range from 5° to 80°. The morphologies and structures of samples were characterized by scanning electron microscope (SEM, JSM-7500F), transmission electron microscopy (TEM, Hitachi HT7700), high-resolution transmission electron microscopy (HRTEM, Hitachi HT7700), and high-angle annular dark-field scanning transmission electron microscopy (HAADF-STEM). Surface valence states of samples were tested by X-ray photoelectron spectroscopy (XPS, ESCALAB 250Xi). Deionized water was used to test the hydrophilicity of samples via contact angle instruments (OCA-20, DataPhysics, Germany).

## **Electrochemical measurements**

The electrochemical properties of the samples were evaluated by assembling CR2025 coin cells. Mo, P-MnO<sub>2</sub>, conductive additive (Super P), and polyvinylidene fluoride (PVDF) were ground evenly at a weight ratio of 7:2:1, and then N-methyl pyrrolidone (NMP) was added to form the slurry. The slurry was coated on stainless steel mesh and dried at 80 °C to prepare cathode material. Besides, Zinc foil, glass fiber, and 2.0 M ZnSO<sub>4</sub> + 0.2 M MnSO<sub>4</sub> were used as anodes, diaphragms, and electrolytes, respectively.

The sandwich-like flexible ZIBs were assembled by using Zn foil, polyacrylamide (PAM) hydrogel, and Mo, P-MnO<sub>2</sub> as anode, electrolyte, and cathode, respectively, and then sealed by polyimide (PI) film. The PAM hydrogel electrolyte with a thickness of ~ 0.4 mm was prepared in a typical way<sup>1</sup>. Preparation of the PAM hydrogel electrolyte

included several steps. Firstly, 1 g of acrylamide monomer was dissolved in 3 ml deionized water, and then 1 mg of N, N'-methylenebisacrylamide crosslinker was introduced and stirred for 10 min. Subsequently, 16 mg of APS was added to initiate the crosslinking reaction. After a continuous magnetic stirring for 5 min, the above mixture was poured into a glass mold and maintained at 65 °C for 1 h to form a PAM hydrogel film. Finally, the PAM hydrogel film was soaked in a 2 M ZnSO<sub>4</sub>/0.1 M MnSO<sub>4</sub> mixture solution for 24 h to get a film-like PAM hydrogel electrolyte with a thickness of ~ 0.3 mm.

Cyclic voltammetry (CV) was performed at a potential window of 0.8–1.8 V on an electrochemical workstation (CHI660D). Electrochemical impedance spectroscopy (EIS) was also tested at CHI660D at frequencies from 0.01 Hz to 100 kHz. The galvanostatic discharge/charge test and the galvanostatic intermittence titration technique (GITT) were studied using a multichannel battery testing system (LAND, CT2001A).

## **Computational details**

DFT implemented in Vienna Ab initio simulation package (VASP) is used in all calculations. The exchange correlation potential is described by the generalized gradient approximation of Perdew-Burke-Ernzerhof (GGA-PBE). The interaction between ion core and valence electron is treated by projection enhanced wave (PAW) method. The cutoff energy of plane wave is fixed at 450 eV. Relax the given structural model until the Hellmann-Feynman force is less than -0.02eV and the energy change is

less than  $10^{-6}$  eV. Grimme's DFT-D3 method is used to describe the dispersed interactions between all atoms in the adsorption model.

## Relevant calculation equations

To explore the dynamics in the cell, the peak current ( $i$ ) and scan rate ( $v$ ) are related by the following equation:

$$i = av^b \quad (S1)$$

where  $a$  and  $b$  are parameters to be determined. The electrochemical charge storage mechanism is characterized by the value of  $b$ , which is in the range of 0.5 to 1, with values close to 0.5 indicating diffusion-controlled reactions and close to 1 indicating capacitive processes.

The capacitive and diffusive contribution ratios of  $\text{MnO}_2$  and  $\text{Mo, P-MnO}_2$  can be quantitatively calculated based on the following equation:

$$i = k_1v + k_2v^{1/2} \quad (S2)$$

The capacitive effect and the diffusion control process are represented by the values of  $k_1v$  and  $k_2v^{1/2}$ , respectively.

Ion transport kinetics are further evaluated by GITT technique. The calculation formula is as follows:

$$D_{\text{ion}} = (4/\pi\tau) (m_A V_M/M_A S)^2 (\Delta E_s/\Delta E_\tau)^2 \quad (S3)$$

where  $m_A$  (g),  $V_M$  ( $\text{cm}^3 \text{mol}^{-1}$ ), and  $M_A$  ( $\text{g mol}^{-1}$ ) are the mass, molar volume, and molecular weight of the cathode, respectively.  $\tau$  is the relaxation time (s),  $s$  is the electrode area ( $\text{cm}^2$ ),  $\Delta E_\tau$  is the voltage change (V) during the current pulse, and  $\Delta E_s$  is

the steady state potential change (V).

## S2. Supporting Figures

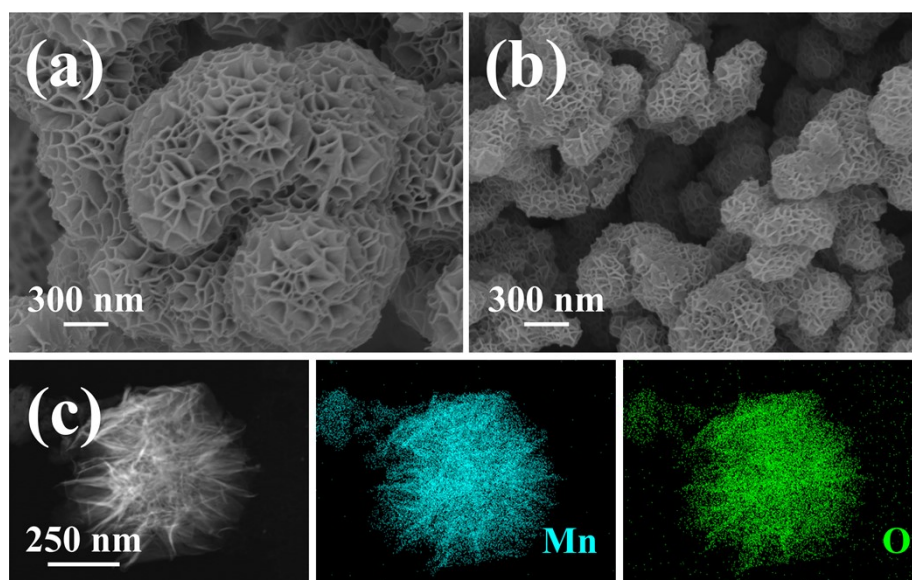

**Fig.S1.** SEM images of (a) P-MnO<sub>2</sub>, (b) Mo-MnO<sub>2</sub>. (c) HAADF-STEM and corresponding elemental mapping images for Mn and O elements of the MnO<sub>2</sub>.

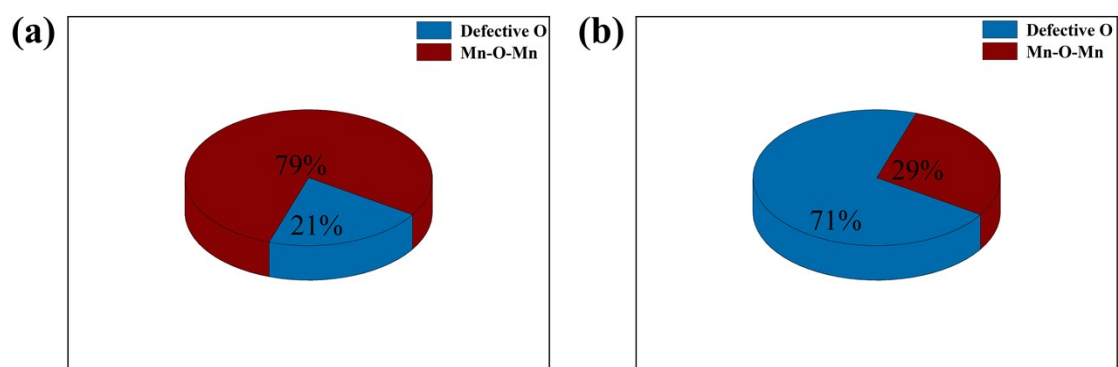

**Fig.S2.** The ratio of defective O to Mn-O-Mn in (a) MnO<sub>2</sub> and (b) Mo, P-MnO<sub>2</sub>.

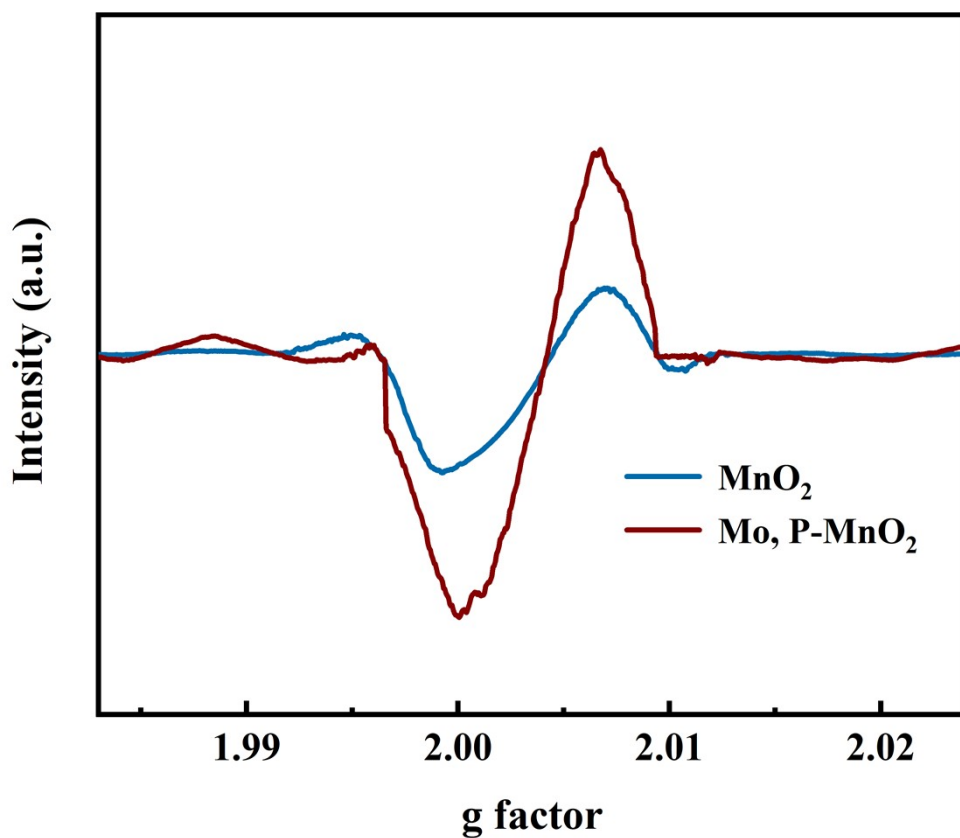

Fig.S3. EPR of MnO<sub>2</sub> and Mo, P-MnO<sub>2</sub>.

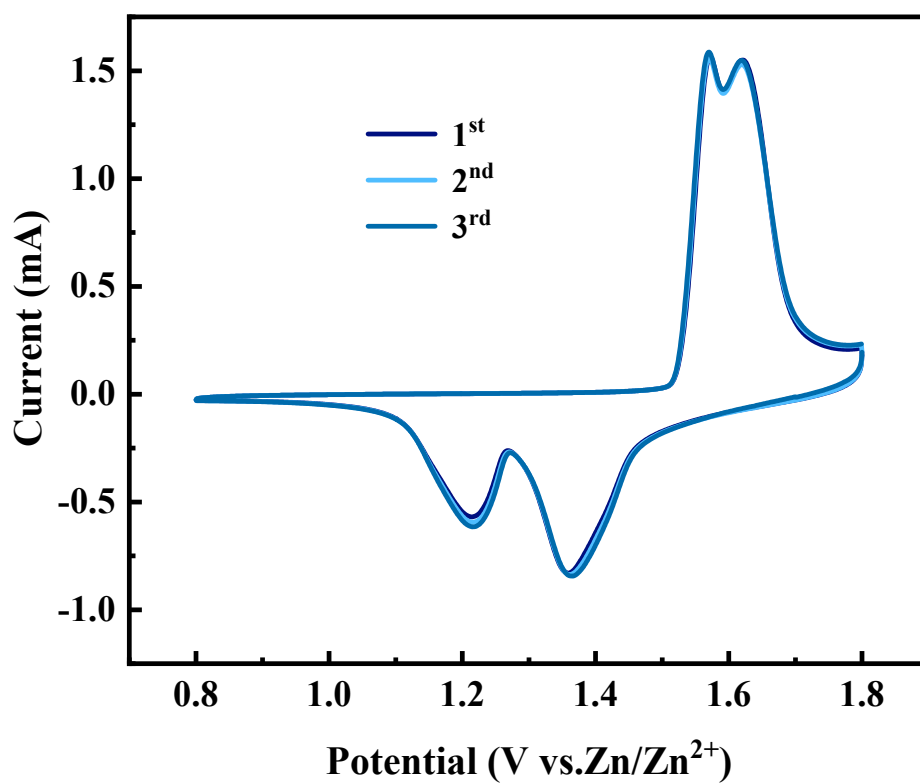

Fig.S4. CV curves of Mo, P-MnO<sub>2</sub> in the initial three cycles.

**Table S1.** Rate performance of MnO<sub>2</sub>, Mo-MnO<sub>2</sub>, P-MnO<sub>2</sub>, and Mo, P-MnO<sub>2</sub> at various currents.

|                       | MnO <sub>2</sub>          | Mo-MnO <sub>2</sub>       | P-MnO <sub>2</sub>        | Mo, P-MnO <sub>2</sub>    |
|-----------------------|---------------------------|---------------------------|---------------------------|---------------------------|
| 0.1 A g <sup>-1</sup> | 257.5 mAh g <sup>-1</sup> | 353.2 mAh g <sup>-1</sup> | 267.3 mAh g <sup>-1</sup> | 367.6 mAh g <sup>-1</sup> |
| 0.3 A g <sup>-1</sup> | 185.0 mAh g <sup>-1</sup> | 303.1 mAh g <sup>-1</sup> | 266.5 mAh g <sup>-1</sup> | 356.8 mAh g <sup>-1</sup> |
| 0.5 A g <sup>-1</sup> | 143.9 mAh g <sup>-1</sup> | 236.1 mAh g <sup>-1</sup> | 257.6 mAh g <sup>-1</sup> | 332.7 mAh g <sup>-1</sup> |
| 1 A g <sup>-1</sup>   | 115.3 mAh g <sup>-1</sup> | 188.6 mAh g <sup>-1</sup> | 226.3 mAh g <sup>-1</sup> | 289.7 mAh g <sup>-1</sup> |
| 2 A g <sup>-1</sup>   | 94.6 mAh g <sup>-1</sup>  | 157.3 mAh g <sup>-1</sup> | 192.2 mAh g <sup>-1</sup> | 240.6 mAh g <sup>-1</sup> |
| 3 A g <sup>-1</sup>   | 88.3 mAh g <sup>-1</sup>  | 125.1 mAh g <sup>-1</sup> | 162.2 mAh g <sup>-1</sup> | 202.0 mAh g <sup>-1</sup> |
| 5 A g <sup>-1</sup>   | 75.0 mAh g <sup>-1</sup>  | 85.8 mAh g <sup>-1</sup>  | 110.8 mAh g <sup>-1</sup> | 146.6 mAh g <sup>-1</sup> |

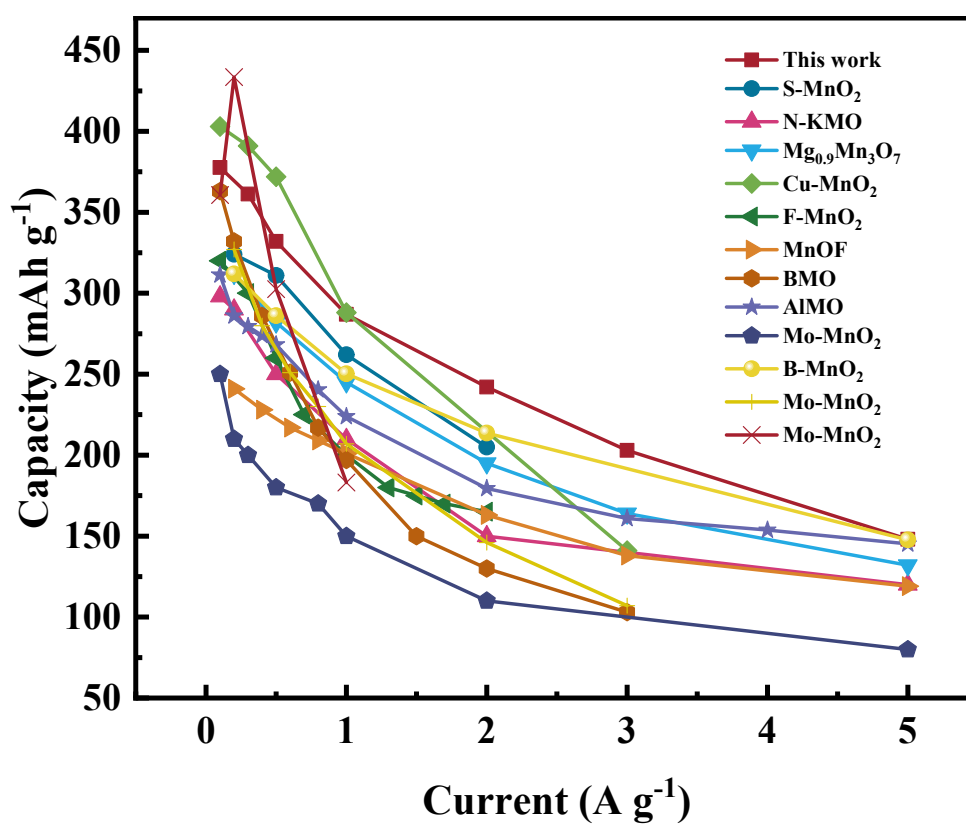

**Fig.S5.** Comparison of rate performance of Mo, P-MnO<sub>2</sub> with some previous manganese-based cathodes for ZIBs.<sup>2-13</sup>



The cells are first activated at a low current density of  $0.1 \text{ A g}^{-1}$  for 20 cycles and then cycle at  $0.3 \text{ A g}^{-1}$  (inset in **Fig. S6(a)** and **Fig. S6(b)**) or  $1.0 \text{ A g}^{-1}$  (inset in **Fig. S7(a)** and **Fig. S7(b)**). The capacities of  $\text{MnO}_2$  and Mo, P- $\text{MnO}_2$  all exhibit an upward trend at  $0.1 \text{ A g}^{-1}$  during the activation process. When the electrode discharges at a small current density, the electrochemical polarization is relatively small, which means that the charge distribution on the electrode surface is relatively uniform and the active material can be fully utilized. Therefore, the capacity of the electrode will increase at a small current density ( $0.1 \text{ A g}^{-1}$  or  $0.3 \text{ A g}^{-1}$ ). The gradual increase in capacity with the increase of cycles is also common in other transition metal oxides, including  $\text{FeO}_x$  and Mn-based materials<sup>14, 15</sup>. The possible reasons in this case can be attributed to gradual penetration of electrolyte<sup>16-18</sup>, slow reversible reactions of the active materials<sup>2, 19-21</sup>, and in situ electrochemical activation<sup>22-24</sup>.

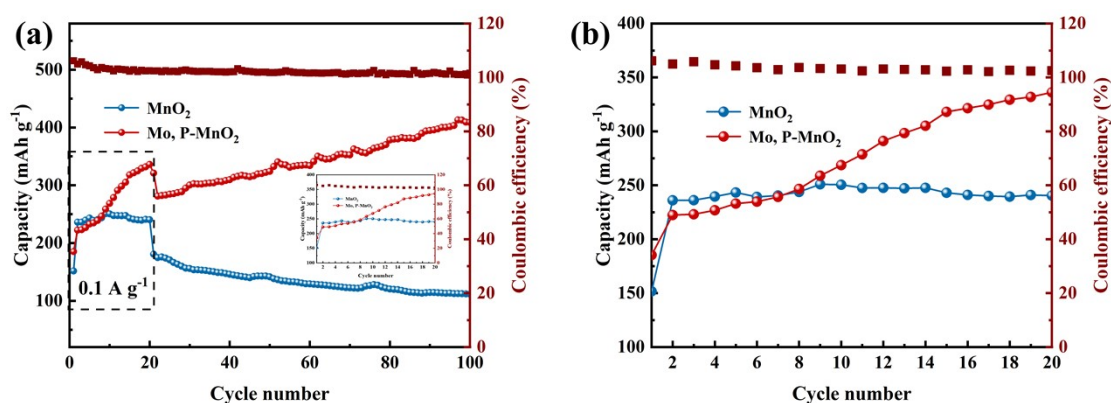

**Fig.S6.** (a) Cycling performance of  $\text{MnO}_2$  and Mo, P- $\text{MnO}_2$  at  $0.3 \text{ A g}^{-1}$  (Inset in (a) shows the corresponding activation process at  $0.1 \text{ A g}^{-1}$  over 20 cycles). (b) the corresponding activation process at  $0.1 \text{ A g}^{-1}$  over 20 cycles.

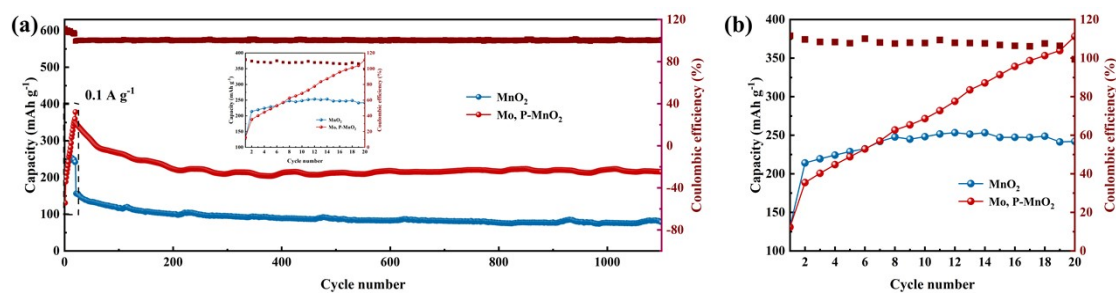

**Fig.S7.** (a) Cycling performance of  $\text{MnO}_2$  and  $\text{Mo, P-MnO}_2$  at  $1.0 \text{ A g}^{-1}$  (Inset in (a) shows the corresponding activation process at  $0.1 \text{ A g}^{-1}$  over 20 cycles). (b) the corresponding activation process at  $0.1 \text{ A g}^{-1}$  over 20 cycles.

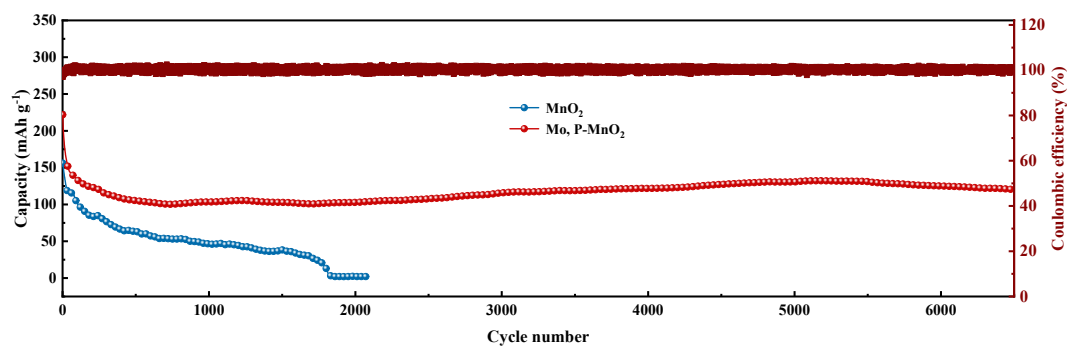

**Fig.S8.** Cycling performance of  $\text{MnO}_2$  and  $\text{Mo, P-MnO}_2$  at  $1.5 \text{ A g}^{-1}$ .

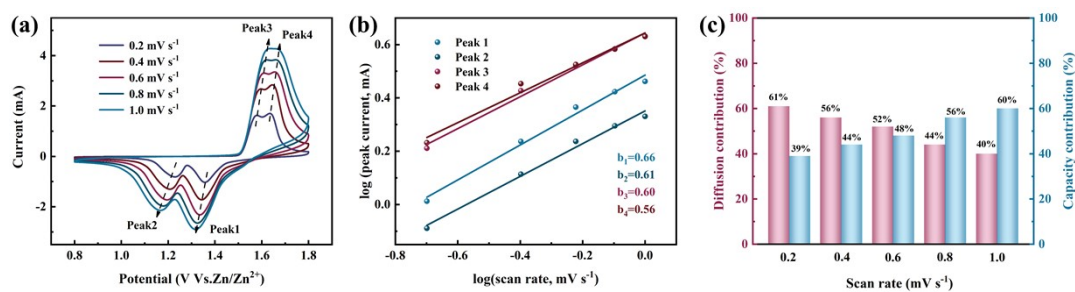

**Fig.S9.** (a) CV curves of  $\text{MnO}_2$  at various current densities (b) linear fitting profiles of  $\log(i) \sim \log(v)$ . (c) Various contribution ratios of capacitance at different scanning rates in the  $\text{MnO}_2$  electrode.

**(a)**

**Normal**

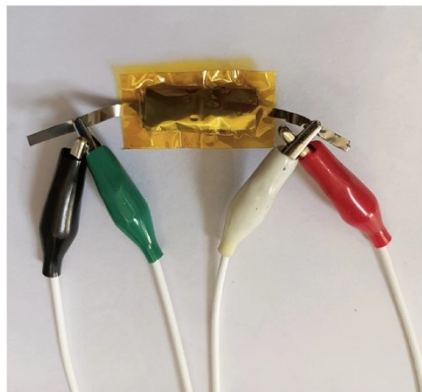

**(b)**

**90° bending**

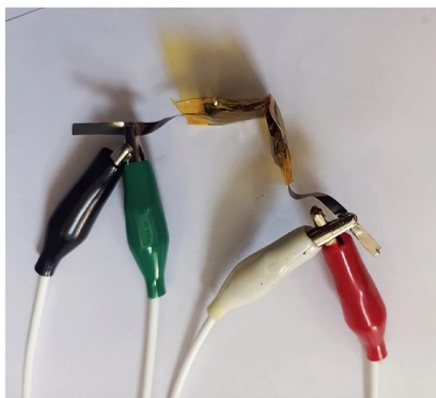

**(c)**

**180° bending**

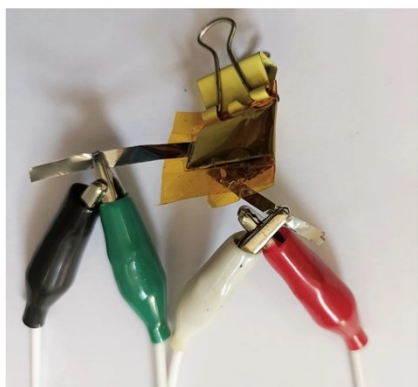

**(d)**

**Recover**

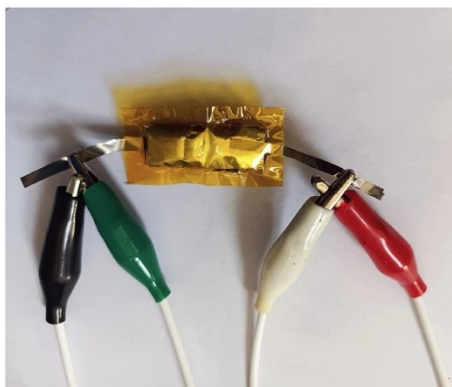

**Fig.S10.** Photos of Mo, P-MnO<sub>2</sub> flexible ZIB under different bending states.

# References

1. Y. Li, X. Li, H. Duan, S. Xie, R. Dai, J. Rong, F. Kang and L. Dong, *Chemical Engineering Journal*, 2022, **441**, 136008.
2. Y. Zhao, P. Zhang, J. Liang, X. Xia, L. Ren, L. Song, W. Liu and X. Sun, *Energy Storage Materials*, 2022, **47**, 424-433.
3. G. Cui, Y. Zeng, J. Wu, Y. Guo, X. Gu and X. W. D. Lou, *Advanced Science*, 2022, **9**, 1-9.
4. J. Li, N. Luo, L. Kang, F. Zhao, Y. Jiao, T. J. Macdonald, M. Wang, I. P. Parkin, P. R. Shearing, D. J. L. Brett, G. Chai and G. He, *Advanced Energy Materials*, 2022, **12**, 202201840.
5. J. Zhang, W. Li, J. Wang, X. Pu, G. Zhang, S. Wang, N. Wang and X. Li, *Angewandte Chemie International Edition*, 2022, **62**, e202215654.
6. S. Kim, B.-R. Koo, Y.-R. Jo, H.-R. An, Y.-G. Lee, C. Huang and G.-H. An, *Journal of Materials Chemistry A*, 2021, **9**, 17211-17222.
7. L. Ding, L. Wang, J. Gao, T. Yan, H. Li, J. Mao, F. Song, S. Fedotov, L. Y. Chang, N. Li, Y. Su, T. Liu and L. Zhang, *Advanced Functional Materials*, 2023, **33**, 2301648.
8. Y. Ma, M. Xu, R. Liu, H. Xiao, Y. Liu, X. Wang, Y. Huang and G. Yuan, *Energy Storage Materials*, 2022, **48**, 212-222.
9. K. Wang, J. Wang, P. Chen, M. Qin, C. Yang, W. Zhang, Z. Zhang, Y. Zhen, F. Fu and B. Xu, *Small*, 2023, **19**, 2300585
10. Z. Zheng, G. Yang, J. Yao, J. Li, J. Zheng, Z. Wu, Y. Gan, C. Wang, L. Lv, H. Wan, C. Chen, H. Wang, L. Tao, J. Zhang and H. Wang, *Applied Surface Science*, 2022, **592**, 153335.
11. S. Deng, B. Xu, X. Liu, C.-W. Kan and T. Chen, *Chemical Engineering Journal*, 2023, **475**, 146098.

12. Z. Wang, K. Han, Q. Wan, Y. Fang, X. Qu and P. Li, *ACS Appl Mater Interfaces*, 2023, **15**, 859-869.
13. X. Xia, Y. Zhao, Y. Zhao, M. Xu, W. Liu and X. Sun, *Nano Research*, 2022, **16**, 2511-2518.
14. C. Zhu, G. Fang, J. Zhou, J. Guo, Z. Wang, C. Wang, J. Li, Y. Tang and S. Liang, *Journal of Materials Chemistry A*, 2018, **6**, 9677-9683.
15. X. Qi, H.-B. Zhang, J. Xu, X. Wu, D. Yang, J. Qu and Z.-Z. Yu, *ACS Applied Materials & Interfaces*, 2017, **9**, 11025-11034.
16. B. Wu, G. Zhang, M. Yan, T. Xiong, P. He, L. He, X. Xu and L. Mai, *Small*, 2018, **14**, 1703850.
17. Z. Li, Y. Zheng, Q. Jiao, Y. Zhao, H. Li and C. Feng, *Chemical Engineering Journal*, 2023, **465**, 142897.
18. Q. Wang, G. Tian, C. Huang and D. Zhang, *Small*, 2023, **19**, 2301189.
19. W. Jiang, X. Xu, Y. Liu, L. Tan, F. Zhou, Z. Xu and R. Hu, *Journal of Alloys and Compounds*, 2020, **827**, 154273.
20. W. Jiang, W. Wang, H. Shi, R. Hu, J. Hong, Y. Tong, J. Ma, C. jing Liang, J. Peng and Z. Xu, *Journal of Colloid and Interface Science*, 2023, **647**, 124-133.
21. W. Jiang, H. Shi, X. Xu, J. Shen, Z. Xu and R. Hu, *Energy & Environmental Materials*, 2020, **4**, 603-610.
22. J. Huang, X. Xie, K. Liu, S. Liang and G. Fang, *Energy & Environmental Materials*, 2022, **6**, e12309.
23. Y. Gao, J. Zhou, L. Qin, Z. Xu, Z. Liu, L. Wang, X. Cao, G. Fang and S. Liang, *Green Energy & Environment*, 2023, **8**, 1429-1436.
24. G. Liang, F. Mo, H. Li, Z. Tang, Z. Liu, D. Wang, Q. Yang, L. Ma and C. Zhi, *Advanced Energy*

*Materials*, 2019, **9**, 1901838.
